# Supplementary figures and images for: Skin Cancer Diagnosis Using CNN Features with Genetic Algorithm and Particle Swarm Optimization Methods
Source: Research Square preprint supplement (doi:10.21203/rs.3.rs-1330798/v1), 2022-02-22

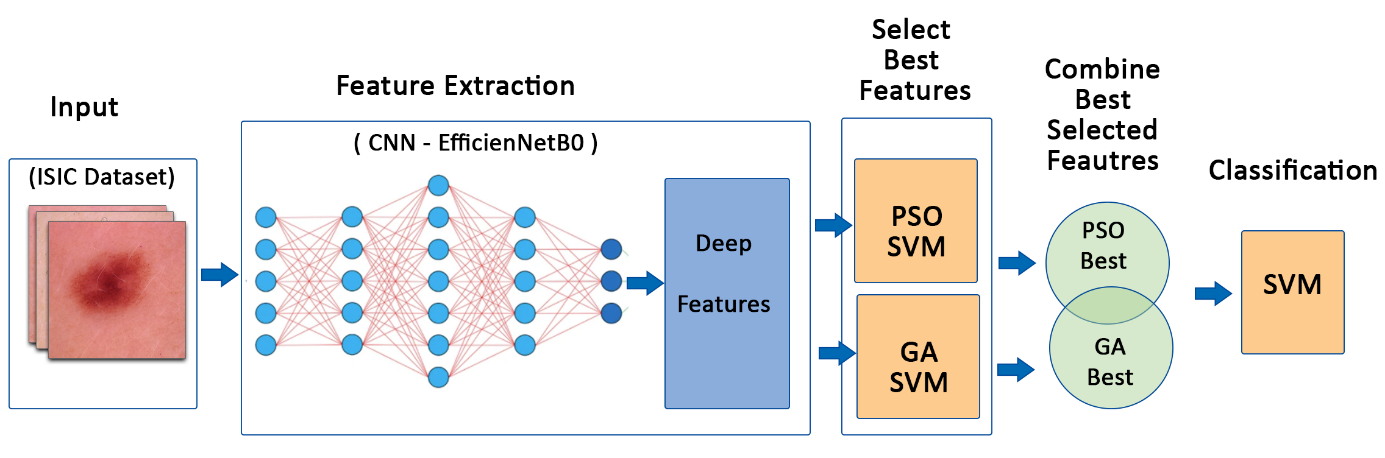


**Figure 3.** Skin Cancer classification Framework

Supplement: Supplementary file 1 [file 51f43e620ffe90a80b8ce5a1.docx]
